# Supplementary material for: Steady states and kinetic modelling of the acid-catalysed ethanolysis of glucose, cellulose, and corn cob to ethyl levulinate
Source: Royal Society of Chemistry journal article supplement (doi:10.1039/d4ya00043a), 2024-01-01
Supplement: d4ya00043a1.pdf [file d4ya00043a1.pdf]

## Supplemental Material

### Literature Review

Numerous studies have detailed the acid-catalysed hydrolysis of carbohydrates in other alcohols in a one-pot system. These reports were recently addressed in a comprehensive review by Galletti and co-workers [1].

The reaction of ethanol, in the presence of a Brønsted and/or Lewis acid catalyst, with; glucose [2-23], fructose [2, 5-7, 10-12, 16, 18, 20, 21, 23-32], sucrose [2, 4, 5, 9, 12, 16, 18, 21, 27, 29, 33], mannose [16], maltose [16], inulin [2, 5, 9, 10, 16, 18, 20, 27], cellulose [7, 9, 34-41], starch [10] and a range of biomasses [8, 42-54] has been shown to form ethyl levulinate. These reports use a diverse range of catalysts including mineral (Brønsted) acids [2-5, 38, 40], metal salts (Lewis acids) [6, 37, 41, 55], ion exchange resins [10, 38, 55], sulfonated nanomaterials [4, 7, 10, 18, 30, 33, 55], polyoxometalates [9, 11, 18, 20, 23, 27, 36, 39], zeolites [3, 8, 14, 16, 17, 20, 56], ionic liquids [29, 34] and other miscellaneous nanomaterials [10, 12-15, 17, 19, 22, 24, 25, 28]. Generally, reaction temperature ranges from 120 – 200 °C, while reaction times from 0.5 – 24 hours. The ethyl levulinate yields (mol%) achieved by these catalysts on the ethanolysis of glucose are presented in the results and discussion section of this paper.

The majority of these investigations have focused on investigating the effect of the catalyst on the resulting yield of ethyl levulinate. Both homogeneous and heterogeneous Brønsted and Lewis acids (and combinations thereof) have been investigated intensively. The archetypal catalyst for this reaction is sulphuric acid ( $\text{H}_2\text{SO}_4$ ). Sulphuric acid has several benefits, including low price and abundance on an industrial scale. Silva *et al.* have performed a rigorous techno-economic-analysis on the production of ethyl levulinate from lignocellulosic biomass [57]. They analysed 148 individual production process scenarios and identified fifty-three as the most commercially viable processes, all using sulphuric acid as a catalyst. This shows that complex catalysts appear unlikely to allow economic viability despite notable efforts in identifying new catalytic systems for these reactions.

To date, the highest yield of ethyl levulinate from glucose, 81 %, results from combining acid  $\text{SnO}_2$  (Lewis acid) and zeolite H-USY (Brønsted acid) [22]. Similarly, the highest reported yield of ethyl levulinate from cellulose is 75 %, using a combination of the Lewis acid  $\text{Y}(\text{OTf})_3$  and the Brønsted acid,  $\text{H}_3\text{PO}_4$  [35]. Lewis acids are proposed to catalyse the isomerisation of glucose to fructose and consequently produce higher yields of ethyl levulinate [22]. This can be used to rationalise the observation that the maximum yields of ethyl levulinate from glucose and cellulose via Lewis acid-catalysed isomerisation are approximately equivalent to those obtained from fructose. Thus, the synergistic combination of Lewis and Brønsted acids appears to be a viable strategy to improve the yield of ethyl levulinate from glucose and cellulose. Notably, however, despite a host of studies into more exotic singular Lewis or Brønsted catalytic systems, they generally offer minimal improvements in ethyl levulinate yields compared to sulphuric acid. This is because the rate of reaction depends on the concentration of the hydrogen cation, regardless of its source.

Many studies suggest the use of heterogeneous catalysts. This is most often rationalised in the context of process improvement, recognising that heterogeneous catalysts are more easily removed from the reaction media and recycled. However, while this may be true for ideal model systems (i.e., glucose, fructose, and cellulose), the ethanolysis of biomass results in the formation of insoluble polymeric materials known as humins which prevent the easy recovery of these catalytic materials [1]. For these reasons, sulphuric acid is the catalyst most widely employed in the literature for the ethanolysis of biomass and is also the catalyst chosen in this work.

When considering the alcoholysis processes that use sulphuric acid as the catalyst, there is a clear absence of a detailed and reliable dataset that establishes the steady state conditions of ethyl levulinate production from pure carbohydrates and real-world biomass. This work addresses this knowledge gap by establishing the steady-state conditions for ethyl levulinate production from glucose, cellulose, and corn cob (5, 10, and 20 mass%) at 150 °C. This data has been cast as a detailed kinetic model that accurately describes the experimental yields of crucial chemical species. Moreover, with optimal reaction conditions established, future work entails a temperature-dependent study on the steady states of ethyl levulinate production from pure carbohydrates and real-world biomass.

## Multiple Linear Regression

A detailed literature review was performed on the alcoholysis of glucose to produce ethyl levulinate in ethanol solvent, for various catalysts in a one-pot process. From the data gathered (30 reported yields of ethyl levulinate from glucose), multiple linear regression (MLR) was performed to identify which reaction conditions were statistically significant with regard the production of ethyl levulinate. The independent reaction variables used in the regression were:

1. Feedstock concentration
2. Ethanol concentration
3. Catalyst concentration
4. Catalyst type
5. Reaction temperature
6. Reaction time

From this analysis, no reaction conditions were determined to be statistically significant. The two most common categories of catalyst used were:

1. Inorganic mineral acid and metal salts.
2. Zeolite based catalysts.

A MLR model was separately created for each catalyst type. Within each catalyst type, models were produced for every combination of the independent variables (reaction conditions). The p-value of each coefficient for the reaction conditions were calculated for each model produced. The p-values are indicators that represent how statistically significant an independent variable is and are found using the probability of the observed data occurring by chance. It was found that for both zeolite based and Inorganic mineral acid and metal salt catalysts, both feedstock loading and reaction temperature were statistically significant variables on the yield of ethyl levulinate from glucose. However, there was not enough data to draw any meaningful conclusions. The models produced from MLR are shown in figures 1 and 2.

A literature review on previous ethanolysis kinetic models was carried out and is presented in table 1.

$$-0.47 * \text{Feedstock (mass\%)} + 0.21 * \text{Temperature(}^{\circ}\text{C)} = \text{Yield of Ethyl Levulinate (mol\%)}$$

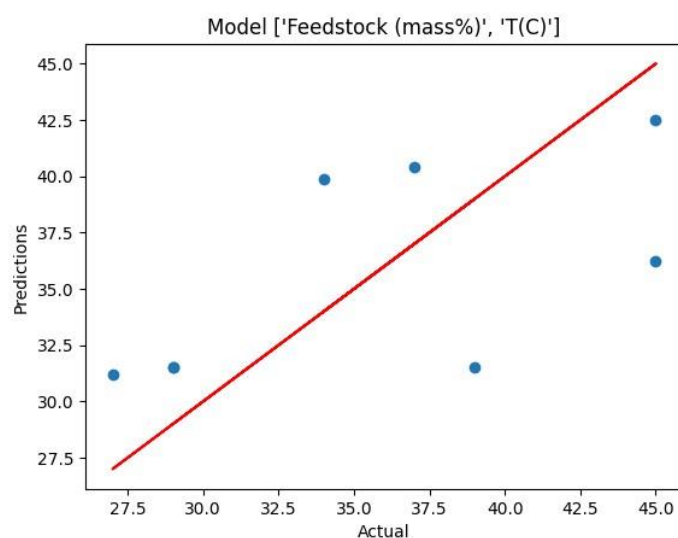

**Figure 1.** Predicted ethyl levulinate yields (mol%) versus the actual yields (mol%) reported from the literature based on two reaction conditions: feedstock loading (mass%) and reaction temperature ( $^{\circ}\text{C}$ ). This model only considers glucose as a feedstock and Inorganic mineral acid and metal salts as catalysts. The model's equation is presented above the plot shown.

$$-3.80 * \text{Feedstock (mass\%)} + 0.29 * \text{Temperature(}^{\circ}\text{C)} = \text{Yield of Ethyl Levulinate (mol\%)}$$

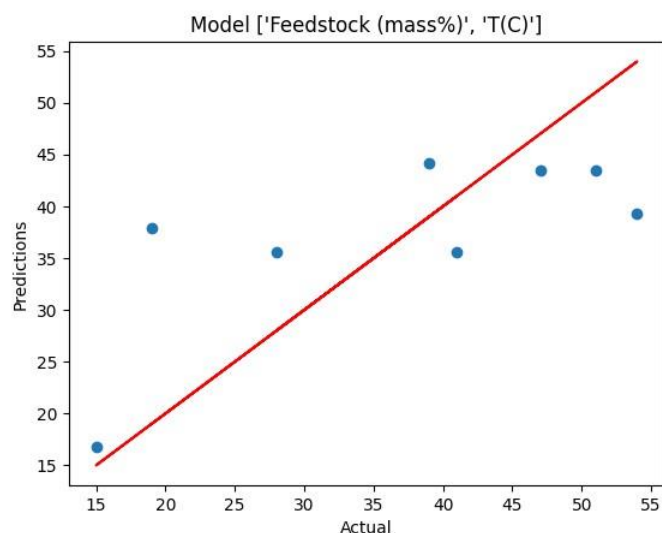

**Figure 2.** Predicted ethyl levulinate yields (mol%) versus the actual yields reported from the literature based on two reaction conditions: feedstock loading (mass%) and reaction temperature ( $^{\circ}\text{C}$ ). This model only considers glucose as a feedstock and zeolite based materials as catalysts. The model's equation is presented above the plot shown.

| Literature Review of Ethanolysis Kinetic Models |                      |                           |                                                                               |                        |                       |
|-------------------------------------------------|----------------------|---------------------------|-------------------------------------------------------------------------------|------------------------|-----------------------|
| Feedstock                                       | Reaction Time (mins) | Reaction Temperature (°C) | Reaction mechanism                                                            | Fidelity               | Ref.                  |
| Fructose                                        | 480                  | 78                        | $Fructose \xrightarrow{H^+} HMF + 3H_2O$                                      | R <sup>2</sup> = 0.75  | Flannelly et al. [58] |
|                                                 |                      |                           | $HMF + Ethanol \xrightarrow{H^+} EMF + H_2O$                                  |                        |                       |
|                                                 |                      |                           | $EMF + 2H_2O \xrightarrow{H^+} HMF + Formic\ acid$                            |                        |                       |
|                                                 |                      |                           | $Fructose + Ethanol \xrightarrow{H^+} Ethyl\ glucosides + H_2O$               |                        |                       |
|                                                 |                      |                           | $Ethyl\ glucosides + H_2O \xrightarrow{H^+} fructose + Ethanol$               |                        |                       |
| Fructose                                        | 250                  | 180                       | $Fructose \xrightarrow{H^+} HMF + 3H_2O$                                      | R <sup>2</sup> = 0.93  | Howard at al. [59]    |
|                                                 |                      |                           | $HMF + Ethanol \xrightarrow{H^+} EMF + H_2O$                                  |                        |                       |
|                                                 |                      |                           | $EMF + 2H_2O \xrightarrow{H^+} HMF + Formic\ acid$                            |                        |                       |
|                                                 |                      |                           | $Fructose + Ethanol \xrightarrow{H^+} Ethyl\ glucosides + H_2O$               |                        |                       |
|                                                 |                      |                           | $Ethyl\ glucosides + H_2O \xrightarrow{H^+} fructose + Ethanol$               |                        |                       |
| Glucose                                         | 1600                 | 180                       | $Fructose \xrightarrow{H^+} Unknowns$                                         | R <sup>2</sup> = 0.90  | Howard at al. [59]    |
|                                                 |                      |                           | $Glucose + Ethanol \xrightarrow{H^+} Ethyl\ glucosides + H_2O$                |                        |                       |
|                                                 |                      |                           | $Ethyl\ glucosides + H_2O \xrightarrow{H^+} Glucose + Ethanol$                |                        |                       |
|                                                 |                      |                           | $Ethyl\ glucosides \xrightarrow{H^+} Ethyl\ levulinate + Formic\ acid + H_2O$ |                        |                       |
|                                                 |                      |                           | $Glucose \xrightarrow{H^+} Unknowns\ A$                                       |                        |                       |
| Glucose                                         | 210                  | 160                       | $Ethyl\ glucosides \xrightarrow{H^+} Unknowns\ B$                             | R <sup>2</sup> = 0.986 | Zhu et al. [60]       |
|                                                 |                      |                           | $Glucose \xrightarrow{H^+} Ethyl\ levulinate + Ethyl\ acetate$                |                        |                       |
| Glucose                                         | 210                  | 180                       | $Glucose \xrightarrow{H^+} Humin + unidentified\ soluble\ products$           | R <sup>2</sup> = 0.986 | Zhu et al. [60]       |
|                                                 |                      |                           | $Glucose \xrightarrow{H^+} Ethyl\ levulinate + Ethyl\ acetate$                |                        |                       |
| Glucose                                         | 210                  | 200                       | $Glucose \xrightarrow{H^+} Ethyl\ levulinate + Ethyl\ acetate$                | R <sup>2</sup> = 0.986 | Zhu et al. [60]       |

**Table 1.** Literature review of the kinetic modelling of the ethanolysis of carbohydrates using a sulphuric acid catalyst for a closed homogeneous isothermal reaction system.

## Ultimate and Proximate Analysis of Humins

**Table 2.** Ultimate and Proximate Analysis of humin samples

| Reaction Conditions |                           |                      |                       | Elemental Analysis (mass %) <i>db</i> |      |          |      |          |      |         |      |        |      | Proximate Analysis (mass %) <i>db</i> |       |       | HHV (MJ/kg) |
|---------------------|---------------------------|----------------------|-----------------------|---------------------------------------|------|----------|------|----------|------|---------|------|--------|------|---------------------------------------|-------|-------|-------------|
| Feedstock           | Feedstock Loading (mass%) | Reaction Time (mins) | Feedstock /Acid ratio | Carbon                                |      | Hydrogen |      | Nitrogen |      | Sulphur |      | Oxygen |      | VM                                    | FC    | Ash   |             |
|                     |                           |                      |                       | Ave                                   | SD   | Ave      | SD   | Ave      | SD   | Ave     | SD   | Ave    | SD   |                                       |       |       |             |
| Corn cob            | 20                        | 8000                 | 10                    | 54.99                                 | 1.87 | 3.61     | 0.41 | 1.06     | 0.03 | 4.03    | 0.15 | 26.14  | 1.33 | 55.79                                 | 34.02 | 10.18 | 19.09       |
| Corn cob            | 20                        | 8000                 | 40                    | 66.67                                 | 0.16 | 5.23     | 0.03 | 0.10     | 0.01 | 0.80    | 0.04 | 21.15  | 0.08 | 58.33                                 | 35.62 | 6.05  | 26.23       |
| Corn cob            | 20                        | 10000                | 10                    | 55.51                                 | 3.54 | 4.09     | 0.24 | 1.09     | 0.02 | 4.71    | 0.05 | 25.54  | 3.76 | 54.02                                 | 36.92 | 9.06  | 20.05       |
| Corn cob            | 20                        | 4000                 | 10                    | 55.48                                 | 0.46 | 3.80     | 0.10 | 1.00     | 0.01 | 2.58    | 0.07 | 28.81  | 0.45 | 52.76                                 | 38.92 | 8.32  | 19.06       |
| Cellulose           | 20                        | 10000                | 40                    | 68.45                                 | 0.89 | 4.89     | 0.08 | 0.13     | 0.01 | 0.48    | 0.03 | 19.96  | 1.00 | 58.57                                 | 35.35 | 6.08  | 26.57       |
| Corn cob            | 20                        | 6000                 | 10                    | 60.32                                 | 1.60 | 4.41     | 0.38 | 1.14     | 0.09 | 3.32    | 0.72 | 21.16  | 2.79 | 54.92                                 | 35.44 | 9.65  | 22.92       |
| Corn cob            | 20                        | 9000                 | 10                    | 62.47                                 | 1.19 | 4.64     | 0.10 | 1.15     | 0.02 | 2.41    | 0.11 | 19.69  | 1.42 | 55.58                                 | 34.78 | 9.64  | 24.23       |
| Corn cob            | 20                        | 7000                 | 10                    | 56.20                                 | 3.33 | 4.10     | 0.35 | 1.07     | 0.07 | 2.28    | 0.10 | 27.18  | 3.85 | 54.09                                 | 36.75 | 9.17  | 20.01       |
| Corn cob            | 10                        | 10000                | 20                    | 60.64                                 | 1.14 | 4.44     | 0.10 | 1.21     | 0.01 | 0.85    | 0.09 | 23.24  | 1.13 | 53.24                                 | 37.13 | 9.63  | 22.70       |
| Corn cob            | 20                        | 5000                 | 10                    | 54.58                                 | 1.38 | 3.50     | 0.47 | 1.00     | 0.00 | 1.72    | 0.06 | 29.41  | 1.91 | 52.86                                 | 37.34 | 9.80  | 18.21       |
| Corn cob            | 20                        | 10000                | 40                    | 56.50                                 | 1.20 | 6.02     | 0.25 | 1.03     | 0.02 | 0.49    | 0.32 | 25.63  | 1.29 | 65.86                                 | 23.80 | 10.34 | 23.11       |
| Cellulose           | 20                        | 6000                 | 40                    | 69.25                                 | 3.20 | 4.89     | 0.23 | 0.12     | 0.00 | 1.08    | 0.03 | 18.41  | 3.46 | 55.33                                 | 38.41 | 6.25  | 27.10       |
| Corn cob            | 20                        | 9000                 | 40                    | 50.91                                 | 2.01 | 5.27     | 0.11 | 0.96     | 0.01 | 1.28    | 0.20 | 32.03  | 2.33 | 67.72                                 | 22.73 | 9.55  | 19.02       |
| Corn cob            | 20                        | 4000                 | 40                    | 49.20                                 | 4.53 | 5.28     | 0.55 | 0.87     | 0.07 | 1.11    | 0.36 | 33.29  | 5.51 | 70.25                                 | 19.51 | 10.24 | 18.24       |
| Corn cob            | 20                        | 7000                 | 40                    | 48.03                                 | 0.82 | 5.08     | 0.08 | 0.85     | 0.03 | 1.13    | 0.02 | 34.65  | 0.95 | 68.77                                 | 20.98 | 10.25 | 17.31       |
| Cellulose           | 20                        | 7000                 | 40                    | 63.84                                 | 0.56 | 4.33     | 0.07 | 0.09     | 0.00 | 0.92    | 0.01 | 25.32  | 0.63 | 57.00                                 | 37.50 | 5.50  | 23.25       |
| Cellulose           | 20                        | 9000                 | 40                    | 64.21                                 | 5.64 | 4.03     | 1.07 | 0.11     | 0.01 | 0.82    | 0.16 | 30.51  | 6.88 | 61.70                                 | 37.98 | 0.32  | 22.04       |
| Corn cob            | 20                        | 5000                 | 40                    | 47.85                                 | 0.59 | 5.03     | 0.03 | 0.88     | 0.01 | 0.76    | 0.10 | 40.58  | 0.53 | 72.60                                 | 22.49 | 4.90  | 16.12       |
| Cellulose           | 20                        | 5000                 | 40                    | 64.65                                 | 0.38 | 4.79     | 0.00 | 0.06     | 0.00 | 0.88    | 0.03 | 28.91  | 0.34 | 65.60                                 | 33.68 | 0.72  | 23.54       |
| Corn cob            | 20                        | 6000                 | 40                    | 49.92                                 | 0.89 | 4.96     | 0.12 | 0.93     | 0.01 | 0.69    | 0.03 | 38.64  | 1.06 | 71.54                                 | 23.59 | 4.87  | 17.07       |
| Corn cob            | 20                        | 8000                 | 40                    | 51.55                                 | 2.45 | 5.23     | 0.29 | 0.95     | 0.06 | 0.96    | 0.39 | 36.23  | 3.19 | 72.13                                 | 22.77 | 5.09  | 18.43       |
| Cellulose           | 20                        | 4000                 | 40                    | 67.44                                 | 5.00 | 4.54     | 0.63 | 0.08     | 0.00 | 0.76    | 0.06 | 26.49  | 5.58 | 63.30                                 | 36.01 | 0.69  | 24.57       |

db = dry basis, Ave = average, SD = standard deviation, VM = volatile matter, FC = fixed carbon, and HHV = high heating value.

$$HHV \left( \frac{MJ}{kg} \right) = (0.3383 \times C_{(db)}) + (1.422 \times (H_{(db)} - \left( \frac{O_{(db)}}{8} \right)))$$

#### Destination of Sulphuric from Acid Catalyst

After alcoholysis, most of the sulphur content is present in the humins ( $\geq 93.9\%$ ). This is evidenced by the data below in table 2. Considering the longest reaction time (10000 minutes), and lowest feedstock/acid ratio (10), shown in table 1, the humins produced have a sulphur content of 4.71 mass %. The mass of humins produced from this reaction is 0.65 g, giving 0.031g of sulphuric present in the humins. For this reaction, 2 mass % of sulphuric acid was used in a total reaction system of 5 g, which is the equivalent of 0.1 g of sulphuric acid initially. This gives a sulphur content of 0.033 g.

$$\text{Recovered Sulphuric Content} = \frac{\text{Sulphur in Humins at 10000 minutes (g)}}{\text{Sulphur in Acid Catalyst (g)}} \times 100\% = \frac{0.31}{0.33} \times 100\% = 93.9\%$$

Considering the inherent mass loss attributed to humins measurements via centrifugation, this is a sufficiently high percentage to conclude that most, if not all the sulphur from the acid catalyst is present in the produced humins after ethanolysis reactions.

## References

- [1] A.M. Raspolli Galletti, C. Antonetti, S. Fulignati, D. Licursi, Direct Alcoholysis of Carbohydrate Precursors and Real Cellulosic Biomasses to Alkyl Levulinates: A Critical Review, *Catalysts* 10 (2020) 1221.
- [2] G. Xu, B. Chen, Z. Zheng, K. Li, H. Tao, One-pot ethanolysis of carbohydrates to promising biofuels: 5-ethoxymethylfurfural and ethyl levulinate, *Asia-Pacific Journal of Chemical Engineering* 12 (2017) 527-535.
- [3] G.-Z. Xu, C. Chang, W.-N. Zhu, B. Li, X.-J. Ma, F.-G. Du, A comparative study on direct production of ethyl levulinate from glucose in ethanol media catalysed by different acid catalysts, *Chemical Papers* 67 (2013) 1355-1363.
- [4] M. Bosilj, J. Schmidt, A. Fischer, R.J. White, One pot conversion of glucose to ethyl levulinate over a porous hydrothermal acid catalyst in green solvents, *RSC Advances* 9 (2019) 20341-20344.
- [5] J.R. Bernardo, M.C. Oliveira, A.C. Fernandes, HReO<sub>4</sub> as highly efficient and selective catalyst for the conversion of carbohydrates into value added chemicals, *Molecular Catalysis* 465 (2019) 87-94.
- [6] K. Sun, L. Zhang, Y. Shao, Q. Li, H. Fan, G. Gao, S. Zhang, Q. Liu, Y. Wang, X. Hu, Conversion of monosaccharides into levulinic acid/esters: impacts of metal sulfate addition and the reaction medium, *Journal of Chemical Technology & Biotechnology* 94 (2019) 3676-3686.
- [7] F. Yu, R. Zhong, H. Chong, M. Smet, W. Dehaen, B.F. Sels, Fast catalytic conversion of recalcitrant cellulose into alkyl levulinates and levulinic acid in the presence of soluble and recoverable sulfonated hyperbranched poly(arylene oxindole)s, *Green Chemistry* 19 (2017) 153-163.
- [8] C. Chang, G. Xu, W. Zhu, J. Bai, S. Fang, One-pot production of a liquid biofuel candidate—Ethyl levulinate from glucose and furfural residues using a combination of extremely low sulfuric acid and zeolite USY, *Fuel* 140 (2015) 365-370.
- [9] J. Chen, G. Zhao, L. Chen, Efficient production of 5-hydroxymethylfurfural and alkyl levulinate from biomass carbohydrate using ionic liquid-based polyoxometalate salts, *RSC Advances* 4 (2014) 4194-4202.
- [10] J. Gu, J. Zhang, D. Li, H. Yuan, Y. Chen, Hyper-cross-linked polymer based carbonaceous materials as efficient catalysts for ethyl levulinate production from carbohydrates, *Journal of Chemical Technology & Biotechnology* 94 (2019) 3073-3083.
- [11] D. Gupta, C. Mukesh, K.K. Pant, Topotactic transformation of homogeneous phosphotungstomolybdic acid materials to heterogeneous solid acid catalyst for carbohydrate conversion to alkyl methylfurfural and alkyl levulinate, *RSC Advances* 10 (2020) 705-718.
- [12] E.Y.C. Jorge, C.G.S. Lima, T.M. Lima, L. Marchini, M.B. Gawande, O. Tomanec, R.S. Varma, M.W. Paixão, Sulfonated dendritic mesoporous silica nanospheres: a metal-free Lewis acid catalyst for the upgrading of carbohydrates, *Green Chemistry* 22 (2020) 1754-1762.
- [13] G. Morales, A. Osatiashtiani, B. Hernández, J. Iglesias, J.A. Melero, M. Paniagua, D. Robert Brown, M. Granollers, A.F. Lee, K. Wilson, Conformal sulfated zirconia monolayer catalysts for the one-pot synthesis of ethyl levulinate from glucose, *Chemical Communications* 50 (2014) 11742-11745.
- [14] N. Mulik, P. Niphadkar, V. Bokade, Synergetic combination of H<sub>2</sub>Zr<sub>1</sub>PW<sub>12</sub>O<sub>40</sub> and Sn-Beta as potential solid acid catalyst for direct one-step transformation of glucose to ethyl levulinate, a biofuel additive, *Environmental Progress & Sustainable Energy* 38 (2019) 13173.

- [15] L. Peng, L. Lin, J. Zhang, J. Shi, S. Liu, Solid acid catalyzed glucose conversion to ethyl levulinate, *Applied Catalysis A: General* 397 (2011) 259-265.
- [16] S. Saravanamurugan, A. Riisager, Zeolite Catalyzed Transformation of Carbohydrates to Alkyl Levulinates, *ChemCatChem* 5 (2013) 1754-1757.
- [17] D. Song, Q. Zhang, Y. Sun, P. Zhang, Y.-H. Guo, J.-L. Hu, Design of Ordered Mesoporous Sulfonic Acid Functionalized ZrO<sub>2</sub>/organosilica Bifunctional Catalysts for Direct Catalytic Conversion of Glucose to Ethyl Levulinate, *ChemCatChem* 10 (2018) 4953-4965.
- [18] J. Zhang, J. Chen, Modified solid acids derived from biomass based cellulose for one-step conversion of carbohydrates into ethyl levulinate, *Journal of Energy Chemistry* 25 (2016) 747-753.
- [19] Z. Zhang, H. Yuan, An alumina-coated UiO-66 nanocrystalline solid superacid with high acid density as a catalyst for ethyl levulinate synthesis, *Journal of Chemical Technology & Biotechnology* 95 (2020) 2930-2942.
- [20] S. Zhao, G. Xu, C. Chang, S. Fang, Z. Liu, F. Du, Direct Conversion of Carbohydrates into Ethyl Levulinate with Potassium Phosphotungstate as an Efficient Catalyst, *Catalysts* 5 (2015) 1897-1910.
- [21] S. Zhao, G. Xu, J. Chang, C. Chang, J. Bai, S. Fang, Z. Liu, Direct Production of Ethyl Levulinate from Carbohydrates Catalyzed by H-ZSM-5 Supported Phosphotungstic Acid, *2015* 10 (2015) 12.
- [22] J. Heda, P. Niphadkar, V. Bokade, Efficient Synergetic Combination of H-USY and SnO<sub>2</sub> for Direct Conversion of Glucose into Ethyl Levulinate (Biofuel Additive), *Energy & Fuels* 33 (2019) 2319-2327.
- [23] S.R. B, K.K. P, D.L. D, L. N, One pot selective transformation of biomass derived chemicals towards alkyl levulinates over titanium exchanged heteropoly tungstate catalysts, *Catal. Today* 309 (2018) 269-275.
- [24] Z. Babaei, A. Najafi Chermahini, M. Dinari, Alumina-coated mesoporous silica SBA-15 as a solid catalyst for catalytic conversion of fructose into liquid biofuel candidate ethyl levulinate, *Chemical Engineering Journal* 352 (2018) 45-52.
- [25] C.-H. Kuo, A.S. Poyraz, L. Jin, Y. Meng, L. Pahalagedara, S.-Y. Chen, D.A. Kriz, C. Guild, A. Gudcz, S.L. Suib, Heterogeneous acidic TiO<sub>2</sub> nanoparticles for efficient conversion of biomass derived carbohydrates, *Green Chemistry* 16 (2014) 785-791.
- [26] H. Liu, X. Chen, Y. Zhang, M. Lu, H. Lyu, L. Han, W. Xiao, Alcoholysis of Ball-Milled Corn Stover: The Enhanced Conversion of Carbohydrates into Biobased Chemicals over Combination Catalysts of [Bmim-SO<sub>3</sub>H][HSO<sub>4</sub>] and Al<sub>2</sub>(SO<sub>4</sub>)<sub>3</sub>, *Energy & Fuels* 34 (2020) 7085-7093.
- [27] P.F. Pinheiro, D.M. Chaves, M.J. da Silva, One-pot synthesis of alkyl levulinates from biomass derivative carbohydrates in tin(II) exchanged silicotungstates-catalyzed reactions, *Cellulose* 26 (2019) 7953-7969.
- [28] S. Quereshi, E. Ahmad, K.K.K. Pant, S. Dutta, Insights into Microwave-Assisted Synthesis of 5-Ethoxymethylfurfural and Ethyl Levulinate Using Tungsten Disulfide as a Catalyst, *ACS Sustainable Chemistry & Engineering* 8 (2020) 1721-1729.
- [29] S. Saravanamurugan, O. Nguyen Van Buu, A. Riisager, Conversion of Mono- and Disaccharides to Ethyl Levulinate and Ethyl Pyranoside with Sulfonic Acid-Functionalized Ionic Liquids, *ChemSusChem* 4 (2011) 723-726.
- [30] L. Zhang, Y. Zhu, L. Tian, Y. He, H. Wang, F. Deng, One-pot alcoholysis of carbohydrates to biofuel 5-ethoxymethylfurfural and 5-methoxymethylfurfural via a sulfonic porous polymer, *Fuel Processing Technology* 193 (2019) 39-47.



- [31] F. Chengjiang, L. Yan, Y. Zhaozhuo, L. Hu, Y. Song, Efficient Catalytic Upgrade of Fructose to Alkyl Levulinates with Phenylpyridine- phosphotungstate Solid Hybrids, *Current Green Chemistry* 6 (2019) 44-52.
- [32] D.P. Serrano, J.A. Melero, G. Morales, J. Iglesias, P. Pizarro, Progress in the design of zeolite catalysts for biomass conversion into biofuels and bio-based chemicals, *Catalysis Reviews* 60 (2018) 1-70.
- [33] S. Karnjanakom, P. Maneechakr, C. Samart, S. Kongparakul, G. Guan, A. Bayu, Direct conversion of sugar into ethyl levulinate catalyzed by selective heterogeneous acid under co-solvent system, *Catalysis Communications* 143 (2020) 106058.
- [34] A.S. Amarasekara, B. Wiredu, Acidic Ionic Liquid Catalyzed One-Pot Conversion of Cellulose to Ethyl Levulinate and Levulinic Acid in Ethanol-Water Solvent System, *BioEnergy Research* 7 (2014) 1237-1243.
- [35] I. Bodachivskyi, U. Kuzhiumparambil, D.B.G. Williams, Metal triflates are tunable acidic catalysts for high yielding conversion of cellulosic biomass into ethyl levulinate, *Fuel Processing Technology* 195 (2019) 106159.
- [36] W. Deng, M. Liu, Q. Zhang, Y. Wang, Direct transformation of cellulose into methyl and ethyl glucosides in methanol and ethanol media catalyzed by heteropolyacids, *Catalysis Today* 164 (2011) 461-466.
- [37] Y.-B. Huang, T. Yang, Y.-T. Lin, Y.-Z. Zhu, L.-C. Li, H. Pan, Facile and high-yield synthesis of methyl levulinate from cellulose, *Green Chemistry* 20 (2018) 1323-1334.
- [38] C. Ming, K. Sun, Y. Shao, Z. Zhang, S. Zhang, Q. Liu, Y. Wang, S. Hu, J. Xiang, X. Hu, Conversion of Cellulose to Levulinic Acid/Ester over an Acid Catalyst: Impacts of Dispersion of Hydrogen Ions on Polymerization Reactions, *Energy & Fuels* 33 (2019) 11187-11199.
- [39] C. Song, S. Liu, X. Peng, J. Long, W. Lou, X. Li, Catalytic Conversion of Carbohydrates to Levulinate Ester over Heteropolyanion-Based Ionic Liquids, *ChemSusChem* 9 (2016) 3307-3316.
- [40] G. Xu, C. Chang, S. Fang, X. Ma, Cellulose reactivity in ethanol at elevated temperature and the kinetics of one-pot preparation of ethyl levulinate from cellulose, *Renewable Energy* 78 (2015) 583-589.
- [41] L. Zhou, D. Gao, J. Yang, X. Yang, Y. Su, T. Lu, Conversion of recalcitrant cellulose to alkyl levulinates and levulinic acid via oxidation pretreatment combined with alcoholysis over  $\text{Al}_2(\text{SO}_4)_3$ , *Cellulose* 27 (2020) 1451-1463.
- [42] C. Chang, G. Xu, X. Jiang, Production of ethyl levulinate by direct conversion of wheat straw in ethanol media, *Bioresource Technology* 121 (2012) 93-99.
- [43] L. di Bitonto, G. Antonopoulou, C. Braguglia, C. Campanale, A. Gallipoli, G. Lyberatos, I. Ntaikou, C. Pastore, Lewis-Brønsted acid catalysed ethanolysis of the organic fraction of municipal solid waste for efficient production of biofuels, *Bioresource Technology* 266 (2018) 297-305.
- [44] C. Gong, J. Wei, X. Tang, X. Zeng, Y. Sun, L. Lin, Production of levulinic acid and ethyl levulinate from cellulosic pulp derived from the cooking of lignocellulosic biomass with active oxygen and solid alkali, *Korean Journal of Chemical Engineering* 36 (2019) 740-752.
- [45] Q. Guan, T. Lei, Z. Wang, H. Xu, L. Lin, G. Chen, X. Li, Z. Li, Preparation of ethyl levulinate from wheat straw catalysed by sulfonate ionic liquid, *Industrial Crops and Products* 113 (2018) 150-156.
- [46] T.-H. Kim, Y.-K. Oh, J.W. Lee, Y.K. Chang, Levulinate production from algal cell hydrolysis using in situ transesterification, *Algal Research* 26 (2017) 431-435.

- [47] R. Le Van Mao, Q. Zhao, G. Dima, D. Petraccone, New Process for the Acid-Catalyzed Conversion of Cellulosic Biomass (AC3B) into Alkyl Levulinates and Other Esters Using a Unique One-Pot System of Reaction and Product Extraction, *Catalysis Letters* 141 (2011) 271-276.
- [48] H. Liu, Y. Zhang, T. Hou, X. Chen, C. Gao, L. Han, W. Xiao, Mechanical deconstruction of corn stover as an entry process to facilitate the microwave-assisted production of ethyl levulinate, *Fuel Processing Technology* 174 (2018) 53-60.
- [49] J. Tan, Q. Liu, L. Chen, T. Wang, L. Ma, G. Chen, Efficient production of ethyl levulinate from cassava over  $\text{Al}_2(\text{SO}_4)_3$  catalyst in ethanol–water system, *Journal of Energy Chemistry* 26 (2017) 115-120.
- [50] Y.W. Tiong, C.L. Yap, S. Gan, W.S.P. Yap, One-pot conversion of oil palm empty fruit bunch and mesocarp fiber biomass to levulinic acid and upgrading to ethyl levulinate via indium trichloride-ionic liquids, *Journal of Cleaner Production* 168 (2017) 1251-1261.
- [51] J. Yang, J. Park, J. Son, B. Kim, J.W. Lee, Enhanced ethyl levulinate production from citrus peels through an in-situ hydrothermal reaction, *Bioresource Technology Reports* 2 (2018) 84-87.
- [52] Y. Zhang, X. Wang, T. Hou, H. Liu, L. Han, W. Xiao, Efficient microwave-assisted production of biofuel ethyl levulinate from corn stover in ethanol medium, *Journal of Energy Chemistry* 27 (2018) 890-897.
- [53] T. Zhao, Y. Zhang, G. Zhao, X. Chen, L. Han, W. Xiao, Impact of biomass feedstock variability on acid-catalyzed alcoholysis performance, *Fuel Processing Technology* 180 (2018) 14-22.
- [54] W. Zhao, Y. Li, C. Song, S. Liu, X. Li, J. Long, Intensified levulinic acid/ester production from cassava by one-pot cascade prehydrolysis and delignification, *Applied Energy* 204 (2017) 1094-1100.
- [55] R. Liu, J. Chen, X. Huang, L. Chen, L. Ma, X. Li, Conversion of fructose into 5-hydroxymethylfurfural and alkyl levulinates catalyzed by sulfonic acid-functionalized carbon materials, *Green Chemistry* 15 (2013) 2895-2903.
- [56] H. Li, Z. Fang, S. Yang, Direct Conversion of Sugars and Ethyl Levulinate into  $\gamma$ -Valerolactone with Superparamagnetic Acid–Base Bifunctional  $\text{ZrFeO}_x$  Nanocatalysts, *ACS Sustainable Chemistry & Engineering* 4 (2016) 236-246.
- [57] J.F. Leal Silva, R. Grekin, A.P. Mariano, R. Maciel Filho, Making Levulinic Acid and Ethyl Levulinate Economically Viable: A Worldwide Technoeconomic and Environmental Assessment of Possible Routes, *Energy Technology* 6 (2018) 613-639.
- [58] T. Flannelly, S. Dooley, J.J. Leahy, Reaction Pathway Analysis of Ethyl Levulinate and 5-Ethoxymethylfurfural from d-Fructose Acid Hydrolysis in Ethanol, *Energy & Fuels* 29 (2015) 7554-7565.
- [59] M. Howard, Real Reaction Kinetics for the Production and Utilisation of Advanced Biofuels, Department of Chemical Sciences, University of Limerick, 2019.
- [60] W. Zhu, C. Chang, C. Ma, F. Du, Kinetics of Glucose Ethanolysis Catalyzed by Extremely Low Sulfuric Acid in Ethanol Medium, *Chinese Journal of Chemical Engineering* 22 (2014) 238-242.
